# Supplementary material for: Whole-Exome Sequencing (WES) Reveals Novel Sex-Specific Gene Variants in Non-Alcoholic Steatohepatitis (MASH)
Source: MDPI journal article supplement (doi:10.3390/genes15030357), 2024-03-13
Supplement: s1 [file s1]

**Table S1.** Clinicopathological characteristics of normal and NASH cohorts. Total (n=16)

| Parameter                   | Male        |             | Female      |             |
|-----------------------------|-------------|-------------|-------------|-------------|
|                             | Normal      | NASH        | Normal      | NASH        |
| Number of cases             | 4           | 4           | 4           | 4           |
| Mean age, years, SD         | 54 ±12.5    | 56±11.3     | 58.4±13.3   | 59.5±14.5   |
| Race (%)                    | White (100) | White (100) | White (100) | White (100) |
| Diabetes mellitus, %        | 75          | 75          | 75          | 100         |
| Obesity, %                  | 50          | 75          | 75          | 100         |
| BMI, kg/m <sup>2</sup> , SD | 29.6±5.6    | 31±6.4      | 30.3±6.1    | 35.3±6.3    |
| AST, U/L                    | 12±2.6      | 67±11.8     | 26±4.7      | 88±14.1     |
| ALT, U/L                    | 44±5.1      | 92±10.2     | 52±6.1      | 110±10.6    |
| Steatosis, %                | <0.1        | 100         | <0.1        | 100         |
| Steatohepatitis, %          | <0.1        | 75          | <0.1        | 100         |
| Ballooning, %               | <0.1        | 50          | <0.1        | 100         |
| Portal Inflammation, %      | <0.1        | 75          | <0.1        | 100         |
| Fibrosis, %                 | <0.1        | 50          | <0.1        | 75          |

Figure S1  
A)

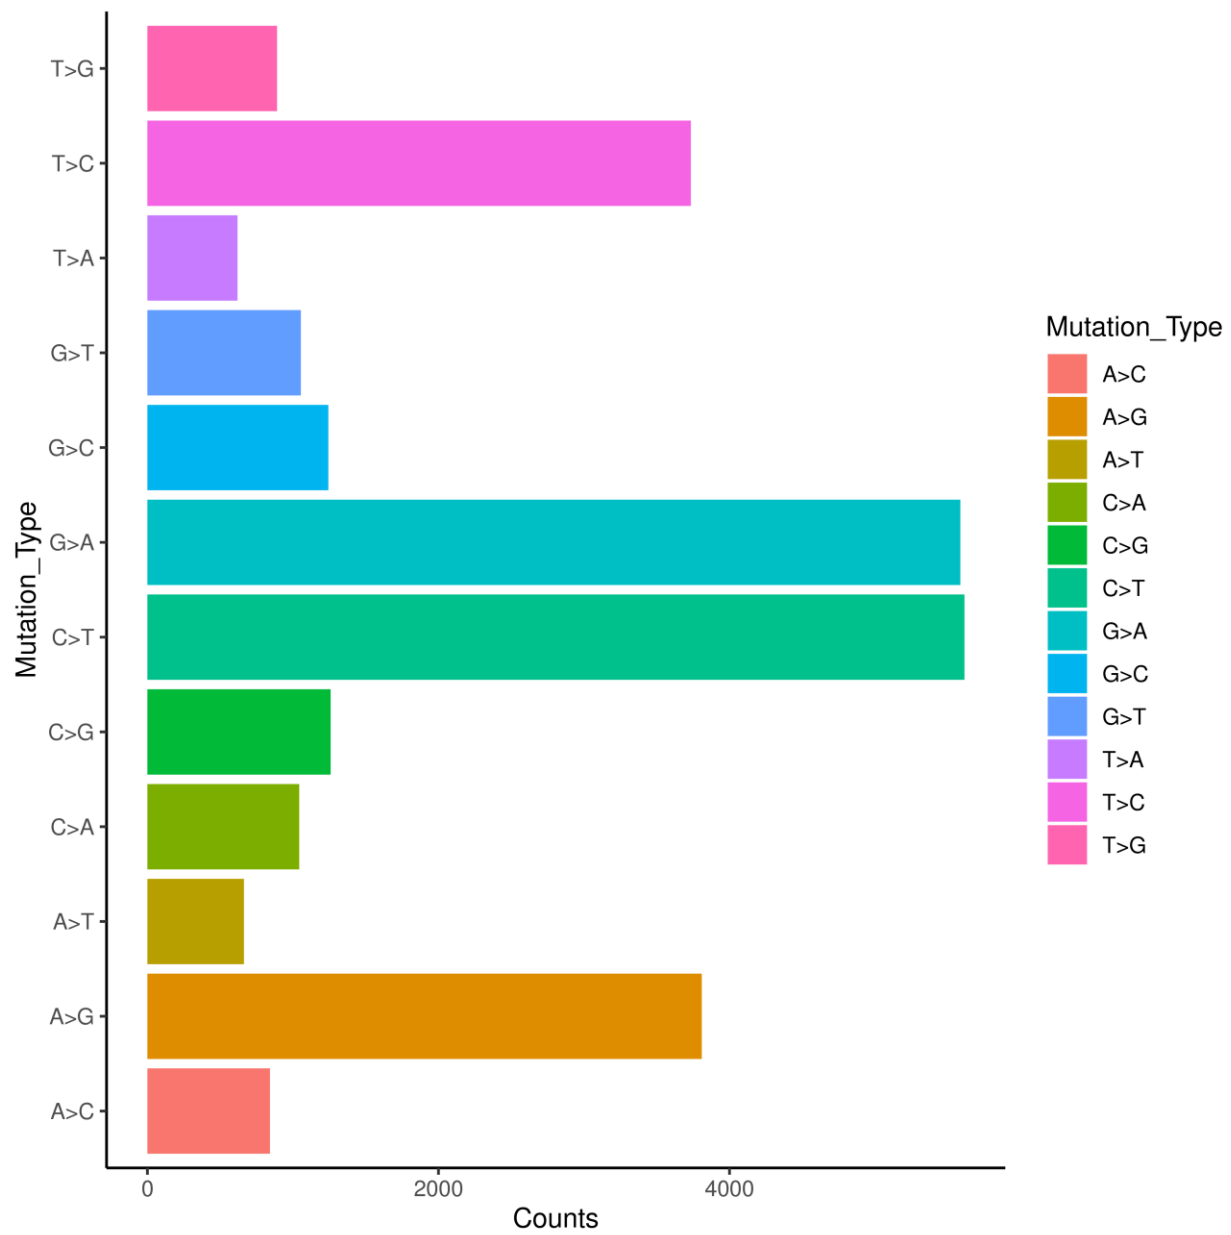

**Figure S1**  
B)

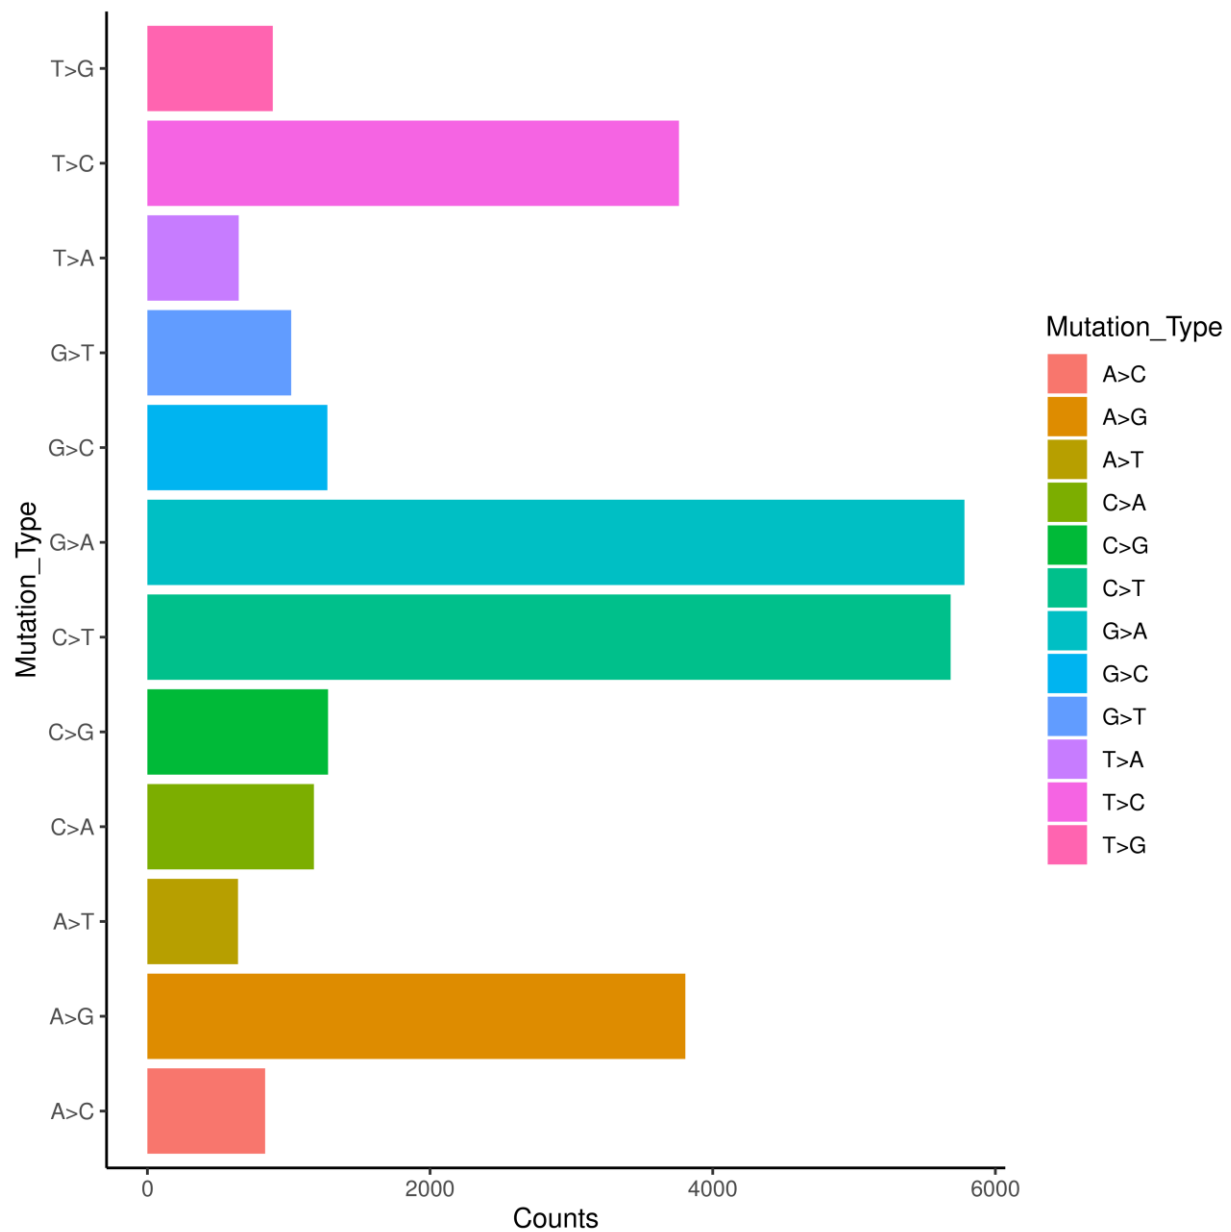

**Figure S1.** Representative of mutation spectrum analysis for NASH-associated female (A) and male (B) liver tissue samples.

Figure S2  
A)

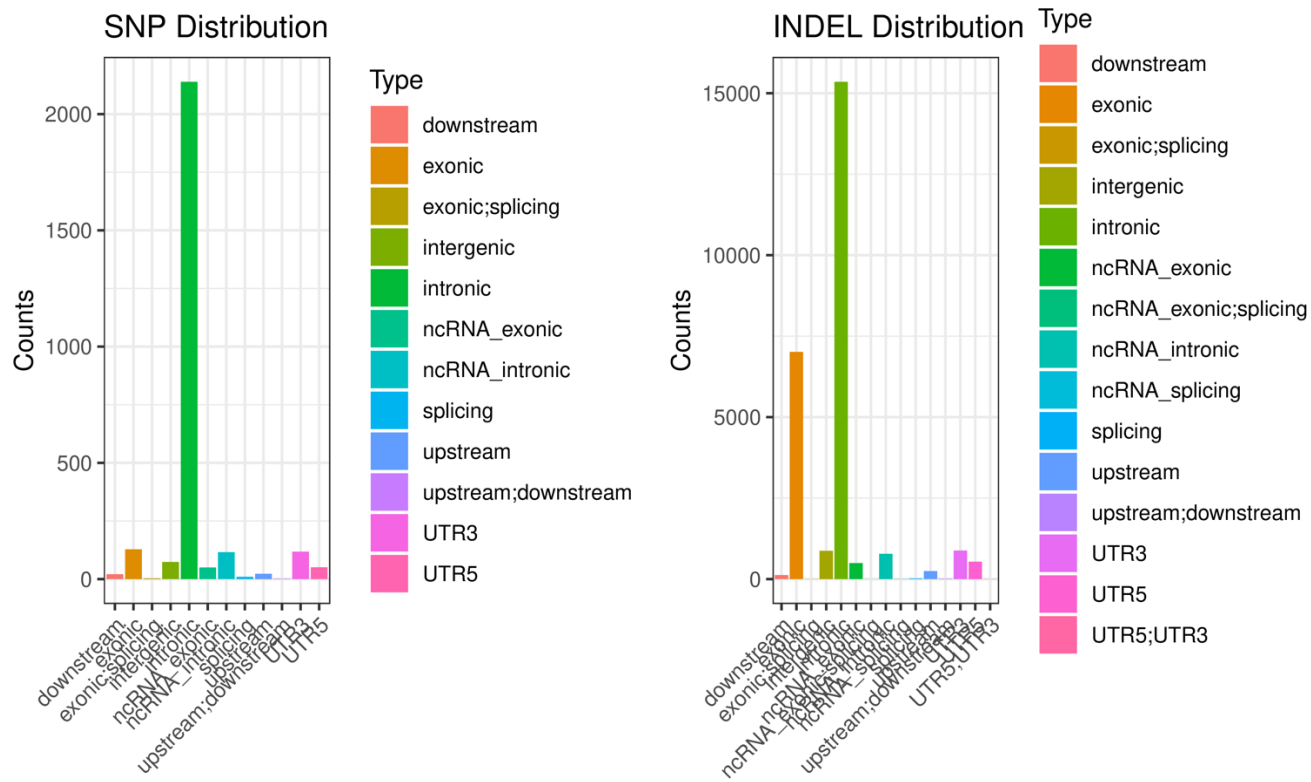

Figure S2  
B)

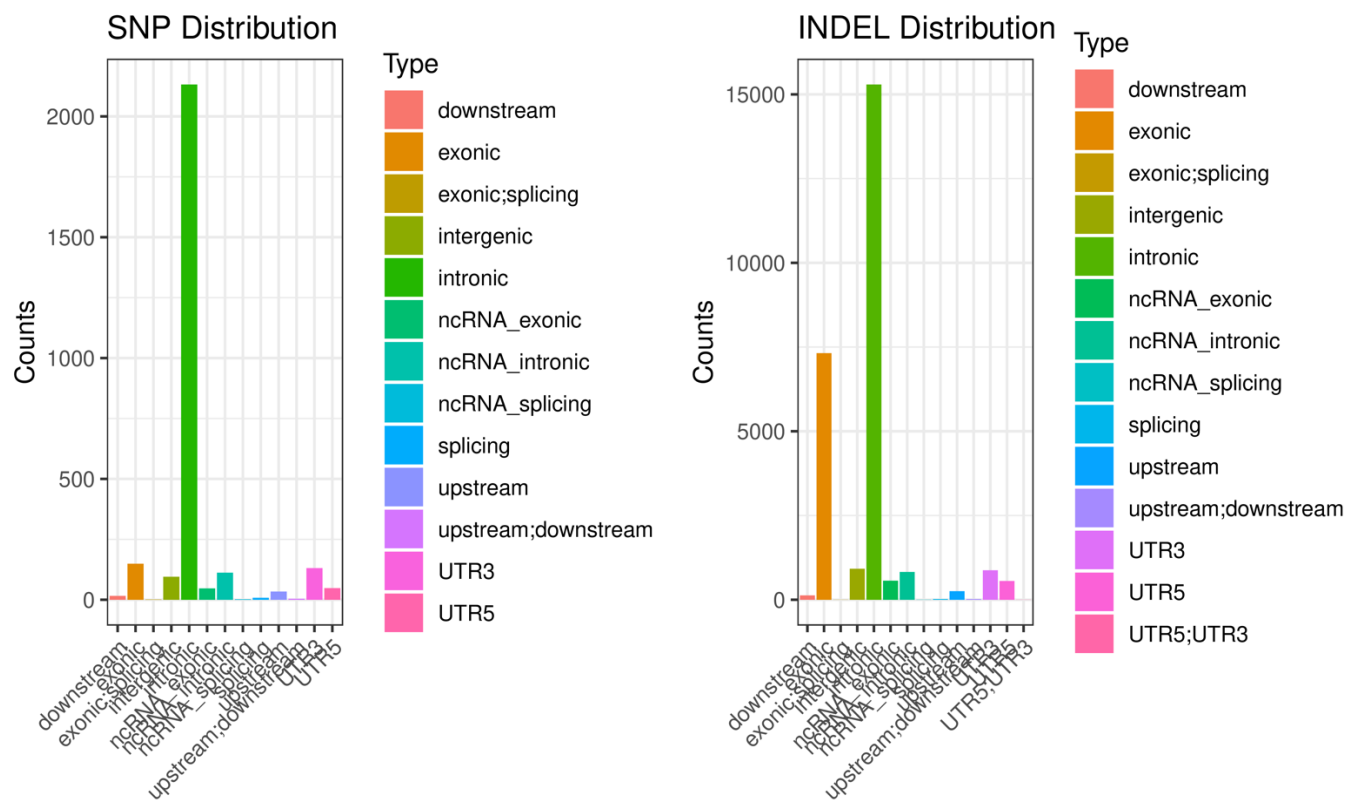

**Figure S2.** Representative of SNP and InDels spectrum analysis for NASH-associated female (A) and male (B) liver tissue samples.
